# Supplementary material
Source: Springer Nature journal article supplement (https://www.springermedizin.de/resource/supplementary/12885_2010_2778_MOESM4_ESM.pdf/9461800)

A All cases (N = 216)

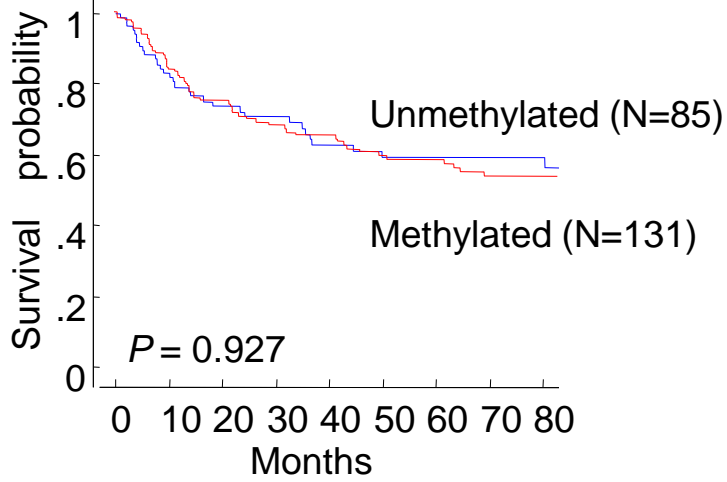

B Adenocarcinoma (N = 126)

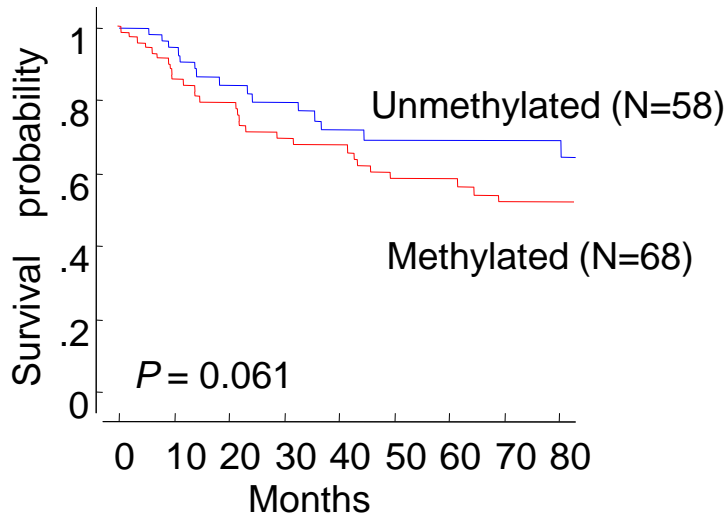

C Squamous cell carcinoma (N = 76)

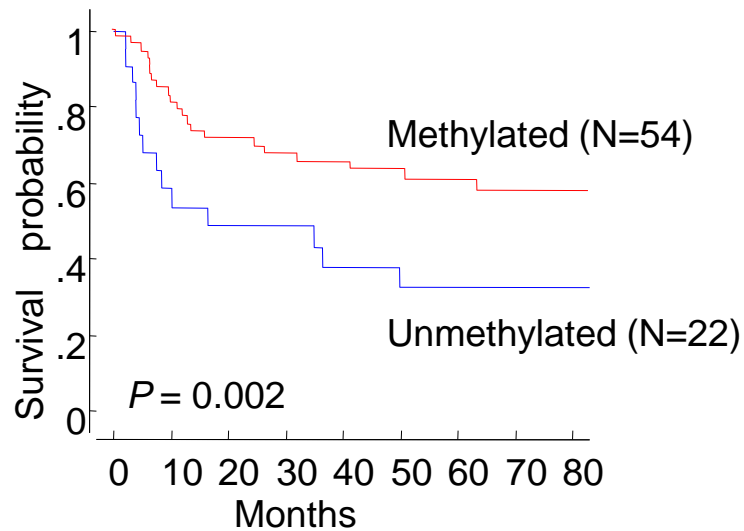

Supplement: MOESM4 [file 9461800]
